# Supplementary material for: Hypervalent iodine(III)-induced methylene acetoxylation of 3-oxo-N-substituted butanamides
Source: publisher site journal article supplement (doi:10.3762/bjoc.7.167), 2011-10-19
Supplement: Additional file 1 [file 1860-5397-7-167-S1.pdf]

**Supporting Information**  
**for**  
**Hypervalent iodine(III)-induced methylene acetoxylation of**  
**3-oxo-N-substituted butanamides**

Wei-Bing Liu<sup>1</sup>, Cui Chen<sup>1</sup>, Qing Zhang<sup>1</sup> and Zhi-Bo Zhu\*<sup>2</sup>

Address: <sup>1</sup>School of Chemistry and Life Science, Guangdong University of  
Petrochemical Technology, Maoming 525000, China and

<sup>2</sup>College of Pharmaceutical Sciences, Southern Medical University, Guangzhou  
510515, China

Email: Zhi-Bo Zhu - zzb24@yahoo.com.cn

\* Corresponding author

**Experimental details and copies of NMR spectra.**

**General methods:** All the reactions were carried out at room temperature in a Schlenk tube equipped with a magnetic stirring bar. Solvents and all reagents were used as received. <sup>1</sup>H NMR spectra were recorded in CDCl<sub>3</sub> at 400 MHz and <sup>13</sup>C NMR spectra were recorded in CDCl<sub>3</sub> at 100 MHz. GC-MS was obtained by electron impact ionization (EI). TLC was performed with commercially prepared 100–400 mesh silica gel plates (GF<sub>254</sub>), and visualized at 254 nm. All the other chemicals were purchased from Aldrich Chemicals.

**Typical procedure for the synthesis of 1-(phenylcarbamoyl)-2-oxopropyl acetate (2a):** To a 10 mL Schlenk tube was added DIB (419 mg, 1.3 mmol), DCE (2 mL) and 3-oxo-*N*-phenylbutanamide (**1a**) (177 mg, 1.0 mmol). The mixture was stirred at rt for 2 h. The solution was directly subjected to isolation by PTLC (GF254), eluted with a 10:4 petroleum ether/ethyl acetate mixture, which furnished **2a** (197.4 mg, 84%) as a colorless solid.

**Characterization data for compounds:**

**1-(Phenylcarbamoyl)-2-oxopropyl acetate (2a) [1]**

<sup>1</sup>H NMR (CDCl<sub>3</sub>, 400 MHz) δ 8.09 (s, 1H), 7.51–7.49 (d, *J* = 8 Hz, 2H), 7.33–7.30 (t, 2H), 7.15–7.12 (t, 1H), 5.61 (s, 1H), 2.44 (s, 3H), 2.27 (s, 3H); <sup>13</sup>C NMR (CDCl<sub>3</sub>, 100 MHz) δ 200.2, 168.8, 161.2, 136.6, 129.3, 125.5, 120.5, 79.5, 28.0, 20.8; MS (EI) *m/z* (%): 193.10 (100.00), 235.05 (20.27).

**1-(*o*-Tolylcarbamoyl)-2-oxopropyl acetate (2b)**

Colorless solid; mp: 83–84 °C; <sup>1</sup>H NMR (CDCl<sub>3</sub>, 400 MHz) δ 8.07 (s, 1H), 7.74–7.72 (d, *J* = 8 Hz, 2H), 7.19–7.16 (m, 3H), 7.10–7.06 (m, 1H), 5.63 (s, 1H), 2.43 (s, 3H), 2.26 (s, 3H), 2.23 (s, 3H); <sup>13</sup>C NMR (CDCl<sub>3</sub>, 100 MHz) δ 200.4, 168.8, 161.4, 134.5, 130.8, 129.8, 127.0, 126.1, 123.1, 79.4, 27.9, 20.7, 17.6; MS (EI) *m/z* (%): 207.05 (100.00), 248.65 (21.69); Anal. calcd for C<sub>13</sub>H<sub>15</sub>NO<sub>4</sub>: C, 62.64; H, 6.07; found: C, 62.55; H, 6.25.

**1-(2-Chlorophenylcarbamoyl)-2-oxopropyl acetate (2c)**

Pale yellow oil; <sup>1</sup>H NMR (CDCl<sub>3</sub>, 400 MHz) δ 8.74 (s, 1H), 8.29–8.27 (d, *J* = 8 Hz, 1H), 7.38–7.36 (d, *J* = 8 Hz, 1H), 7.29–7.26 (m, 1H), 7.09–7.05 (m, 1H), 5.66 (s, 1H), 2.46 (s, 3H), 2.29 (s, 3H); <sup>13</sup>C NMR (CDCl<sub>3</sub>, 100 MHz) δ 199.3, 168.7, 161.4, 133.6, 129.5, 128.1, 125.8, 123.6, 121.7, 79.3, 28.0, 20.7; MS (EI) *m/z* (%): 184.95 (100.00), 268.95 (19.58); Anal. calcd for C<sub>12</sub>H<sub>12</sub>ClNO<sub>4</sub>: C, 53.44; H, 4.49; found: C, 53.41; H, 4.57.

**1-(4-Chlorophenylcarbamoyl)-2-oxopropyl acetate (2d)**

Pale yellow oil; IR  $\nu_{\max}$  (KBr): 3319, 2927, 1933, 1687, 1597, 1533, 1460, 1371, 1091, 1020, 920, 825, 773, 686  $\text{cm}^{-1}$ ;  $^1\text{H}$  NMR ( $\text{CDCl}_3$ , 400 MHz)  $\delta$  8.08 (s, 1H), 7.46–7.44 (d,  $J = 8$  Hz, 2H), 7.29–7.27 (d,  $J = 8$  Hz, 2H), 5.60 (s, 1H), 2.44 (s, 3H), 2.27 (s, 3H);  $^{13}\text{C}$  NMR ( $\text{CDCl}_3$ , 100 MHz)  $\delta$  199.9, 168.5, 160.9, 134.9, 130.2, 129.1, 121.4, 79.0, 27.7, 20.5; MS (EI)  $m/z$  (%): 43.00 (100.00), 268.90 (11.73); Anal. calcd for  $\text{C}_{12}\text{H}_{12}\text{ClNO}_4$ : C, 53.44; H, 4.49; found: C, 53.55; H, 4.39.

**1-(4-Methoxyphenylcarbamoyl)-2-oxopropyl acetate (2e)**

Pale yellow solid; mp: 80–82  $^{\circ}\text{C}$ ; IR  $\nu_{\max}$  (KBr): 3315, 2933, 1736, 1678, 1609, 1514, 1450, 1400, 1365, 1222, 1085, 1028, 912, 829, 707  $\text{cm}^{-1}$ ;  $^1\text{H}$  NMR ( $\text{CDCl}_3$ , 400 MHz)  $\delta$  7.98 (s, 1H), 7.39–7.37 (d,  $J = 8$  Hz, 2H), 6.85–6.83 (d,  $J = 8$  Hz, 2H), 5.60 (s, 1H), 3.76 (s, 3H), 2.44 (s, 3H), 2.26 (s, 3H);  $^{13}\text{C}$  NMR ( $\text{CDCl}_3$ , 100 MHz)  $\delta$  199.9, 168.5, 160.8, 157.0, 129.3, 122.0, 114.2, 79.1, 55.4, 27.7, 20.5; MS (EI)  $m/z$  (%): 123.00 (100.00), 264.95 (40.65); Anal. calcd for  $\text{C}_{13}\text{H}_{15}\text{NO}_5$ : C, 58.86; H, 5.70; found: C, 58.71; H, 5.52.

**1-(2-Methoxyphenylcarbamoyl)-2-oxopropyl acetate (2f)**

Pale yellow oil; IR  $\nu_{\max}$  (KBr): 3408, 2941, 1751, 1687, 1602, 1533, 1111, 1029, 918, 752, 692  $\text{cm}^{-1}$ ;  $^1\text{H}$  NMR ( $\text{CDCl}_3$ , 400 MHz)  $\delta$  8.70 (s, 1H), 8.25–8.23 (m, 1H), 6.94–6.92 (m, 1H), 6.90–6.84 (m, 2H), 5.62 (s, 1H), 3.86 (s, 3H), 2.43 (s, 3H), 2.26 (s, 3H);  $^{13}\text{C}$  NMR ( $\text{CDCl}_3$ , 100 MHz)  $\delta$  199.4, 168.5, 160.7, 148.2, 126.1, 124.7, 120.9, 119.8, 110.0, 79.3, 55.7, 27.6, 20.4; MS (EI)  $m/z$  (%): 123.00 (100.00), 264.95 (22.81); Anal. calcd for  $\text{C}_{13}\text{H}_{15}\text{NO}_5$ : C, 58.86; H, 5.70; found: C, 58.90; H, 5.88.

**1-(2,5-Dichlorophenylcarbamoyl)-2-oxopropyl acetate (2g)**

White solid; mp: 75–77  $^{\circ}\text{C}$ ; IR  $\nu_{\max}$  (KBr): 3433, 2924, 1707, 1583, 1525, 1458, 1406, 1280, 1211, 1089, 1045, 916, 873, 808  $\text{cm}^{-1}$ ;  $^1\text{H}$  NMR ( $\text{CDCl}_3$ , 400 MHz)  $\delta$  8.45 (s, 1H), 7.23 (s, 1H), 7.00–6.99 (d,  $J = 4$  Hz, 1H), 6.98–6.97 (d,  $J = 4$  Hz, 1H), 5.64 (s, 1H), 2.45 (s, 3H), 2.29 (s, 3H);  $^{13}\text{C}$  NMR ( $\text{CDCl}_3$ , 100 MHz)  $\delta$  199.8, 168.3, 160.8, 134.8, 129.8, 129.5, 125.4, 124.7, 121.2, 78.9, 27.2, 20.4; MS (EI)  $m/z$  (%): 43.00 (100.00), 302.85 (6.82); Anal. calcd for  $\text{C}_{12}\text{H}_{11}\text{Cl}_2\text{NO}_4$ : C, 47.39; H, 3.65; found: C, 47.55; H, 3.60.

**1-(*p*-Tolylcarbamoyl)-2-oxopropyl acetate (2h)**

Orange oil; mp: 88–89 °C; IR  $\nu_{\max}$  (KBr): 3365, 1733, 1604, 1597, 1411, 1228, 1089, 916, 819, 727  $\text{cm}^{-1}$ ;  $^1\text{H}$  NMR ( $\text{CDCl}_3$ , 400 MHz)  $\delta$  8.20 (s, 1H), 7.35–7.33 (d,  $J = 8$  Hz, 2H), 6.08–7.06 (d,  $J = 8$  Hz, 2H), 5.57 (s, 1H), 2.39 (s, 3H), 2.26 (s, 3H), 2.21 (s, 3H);  $^{13}\text{C}$  NMR ( $\text{CDCl}_3$ , 100 MHz)  $\delta$  200.0, 168.7, 161.1, 134.9, 133.9, 129.6, 120.3, 79.2, 27.6, 20.8, 20.4; MS (EI)  $m/z$  (%): 107.05 (100.00), 248.95 (22.08); Anal. calcd for  $\text{C}_{13}\text{H}_{15}\text{NO}_4$ : C, 62.64; H, 6.07; found: C, 62.49; H, 5.88.

**1-(4-Ethoxyphenylcarbamoyl)-2-oxopropyl acetate (2i)**

Orange solid; mp: 92–93 °C; IR  $\nu_{\max}$  (KBr): 3356, 2926, 1736, 1678, 1516, 1450, 1365, 1240, 1043, 920, 833, 711  $\text{cm}^{-1}$ ;  $^1\text{H}$  NMR ( $\text{CDCl}_3$ , 400 MHz)  $\delta$  7.97 (s, 1H), 7.38–7.36 (d,  $J = 8$  Hz, 2H), 6.84–6.82 (d,  $J = 8$  Hz, 2H), 5.60 (s, 1H), 4.00–3.95 (q,  $J = 6.4$  Hz, 2H), 2.43 (s, 3H), 2.26 (s, 3H), 1.39–1.35 (t,  $J = 6.4$  Hz, 3H);  $^{13}\text{C}$  NMR ( $\text{CDCl}_3$ , 100 MHz)  $\delta$  199.8, 168.5, 160.7, 156.4, 129.2, 122.0, 114.7, 79.2, 63.6, 27.7, 20.5, 14.7; MS (EI)  $m/z$  (%): 137.05 (100.00), 278.95 (39.33); Anal. calcd for  $\text{C}_{14}\text{H}_{17}\text{NO}_5$ : C, 60.21; H, 6.14; found: C, 60.33; H, 6.11

**1-(2,4-Dimethoxyphenylcarbamoyl)-2-oxopropyl acetate (2j)**

Orange solid; mp: 85–86 °C; IR  $\nu_{\max}$  (KBr): 3408, 2951, 2360, 1732, 1689, 1610, 1537, 1456, 1400, 1365, 1213, 1033, 920, 827, 686  $\text{cm}^{-1}$ ;  $^1\text{H}$  NMR ( $\text{CDCl}_3$ , 400 MHz)  $\delta$  8.44 (s, 1H), 8.08–8.06 (d,  $J = 8$  Hz, 1H), 6.42–6.37 (m, 2H), 5.58 (s, 1H), 3.80 (s, 3H), 3.72 (s, 3H), 2.39 (s, 3H), 2.22 (s, 3H);  $^{13}\text{C}$  NMR ( $\text{CDCl}_3$ , 100 MHz)  $\delta$  199.4, 168.5, 160.3, 157.0, 149.6, 120.7, 119.7, 103.6, 98.5, 79.2, 55.7, 55.4, 27.6, 20.4; MS (EI)  $m/z$  (%): 153.00 (100.00), 294.95 (31.26); Anal. calcd for  $\text{C}_{14}\text{H}_{17}\text{NO}_6$ : C, 56.94; H, 5.80; found: C, 57.02; H, 5.88

**1-(4-Chloro-2,5-dimethoxyphenylcarbamoyl)-2-oxopropyl acetate (2k)**

Orange solid; mp: 101–102 °C; IR  $\nu_{\max}$  (KBr): 3394, 2945, 1732, 1687, 1600, 1533, 1450, 1400, 1213, 727, 694  $\text{cm}^{-1}$ ;  $^1\text{H}$  NMR ( $\text{CDCl}_3$ , 400 MHz)  $\delta$  8.71 (s, 1H), 8.10 (s, 1H), 6.89 (s, 1H), 5.61 (s, 1H), 3.85 (s, 3H), 3.84 (s, 3H), 2.44 (s, 3H), 2.28 (s, 3H);  $^{13}\text{C}$  NMR ( $\text{CDCl}_3$ , 100 MHz)  $\delta$  199.5, 168.5, 160.8, 149.0, 142.2, 125.5, 116.9, 112.4, 104.9, 79.1, 56.7, 56.5, 27.7, 20.4; MS (EI)  $m/z$  (%): 186.90 (100.00), 328.90 (45.95); Anal. calcd for  $\text{C}_{14}\text{H}_{16}\text{ClNO}_6$ : C, 51.00; H, 4.89; found: C, 51.13; H, 4.91.

### **1-(Methylcarbamoyl)-2-oxopropyl acetate(2l)**

Pale yellow oil;  $^1\text{H}$  NMR ( $\text{CDCl}_3$ , 400 MHz)  $\delta$  6.60 (s, 1H), 5.42 (s, 1H), 2.76–2.75 (d,  $J = 4$  Hz, 3H), 2.33 (s, 3H), 2.13 (s, 3H);  $^{13}\text{C}$  NMR ( $\text{CDCl}_3$ , 100 MHz)  $\delta$  199.9, 168.8, 163.8, 79.1, 27.8, 26.2, 20.5; MS (EI)  $m/z$  (%): 89.05 (100.00), 173.15 (1.05); Anal. calcd for  $\text{C}_7\text{H}_{11}\text{NO}_4$ : C, 48.55; H, 6.40; found: C, 48.31; H, 6.57.

### **1,3-Dioxo-1-phenylbutan-2-yl acetate (2m) [2,3]**

IR  $\nu_{\text{max}}$  (KBr): 3446, 1718, 1627, 1394, 1224, 1112, 1018, 918, 696  $\text{cm}^{-1}$ ;  $^1\text{H}$  NMR ( $\text{CDCl}_3$ , 400 MHz)  $\delta$  7.99–7.97 (d,  $J = 8$  Hz, 2H), 7.61–7.58 (m, 1H), 7.51–7.47 (m, 2H), 6.24 (s, 1H), 2.27 (s, 3H), 2.21 (s, 3H);  $^{13}\text{C}$  NMR ( $\text{CDCl}_3$ , 100 MHz)  $\delta$  199.7, 191.1, 169.6, 134.5, 130.4, 129.7, 129.0, 82.5, 27.1, 20.8; MS (EI)  $m/z$  (%): 105.00 (100.00).

### **1,3-Dioxo-1,3-diphenylpropan-2-yl acetate (2n) [3]**

IR  $\nu_{\text{max}}$  (KBr): 3646, 2943, 1720, 1690, 1600, 1444, 1375, 1199, 1004, 906, 713  $\text{cm}^{-1}$ ;  $^1\text{H}$  NMR ( $\text{CDCl}_3$ , 400 MHz)  $\delta$  8.02–8.00 (d,  $J = 8$  Hz, 4H), 7.60–7.57 (m, 2H), 7.47–7.40 (m, 4H), 6.98 (s, 1H), 2.21 (s, 3H);  $^{13}\text{C}$  NMR ( $\text{CDCl}_3$ , 100 MHz)  $\delta$  191.2, 169.5, 134.4, 129.6, 129.0, 127.9, 80.1, 67.3, 20.8; MS (EI)  $m/z$  (%): 105.05 (100.00), 282.00 (0.77).

### **Ethyl 2-acetoxy-3-oxo-3-phenylpropanoate (2o) [3,4]**

IR  $\nu_{\text{max}}$  (KBr): 3429, 2983, 1747, 1691, 1593, 1450, 1379, 1238, 1103, 921, 717, 684  $\text{cm}^{-1}$ ;  $^1\text{H}$  NMR ( $\text{CDCl}_3$ , 400 MHz)  $\delta$  7.94–7.92 (d,  $J = 8$  Hz, 2H), 7.56–7.53 (t, 1H), 7.44–7.40 (m, 2H), 6.27 (s, 1H), 4.19–4.14 (q, 2H), 2.14 (s, 3H), 1.15–1.11 (t, 3H);  $^{13}\text{C}$  NMR ( $\text{CDCl}_3$ , 100 MHz)  $\delta$  189.7, 169.6, 165.2, 134.3, 134.2, 129.2, 128.8, 74.5, 62.5, 20.5, 13.9; MS (EI)  $m/z$  (%): 105.05 (100.00), 249.95 (0.25).

# NMR spectra

## 2a

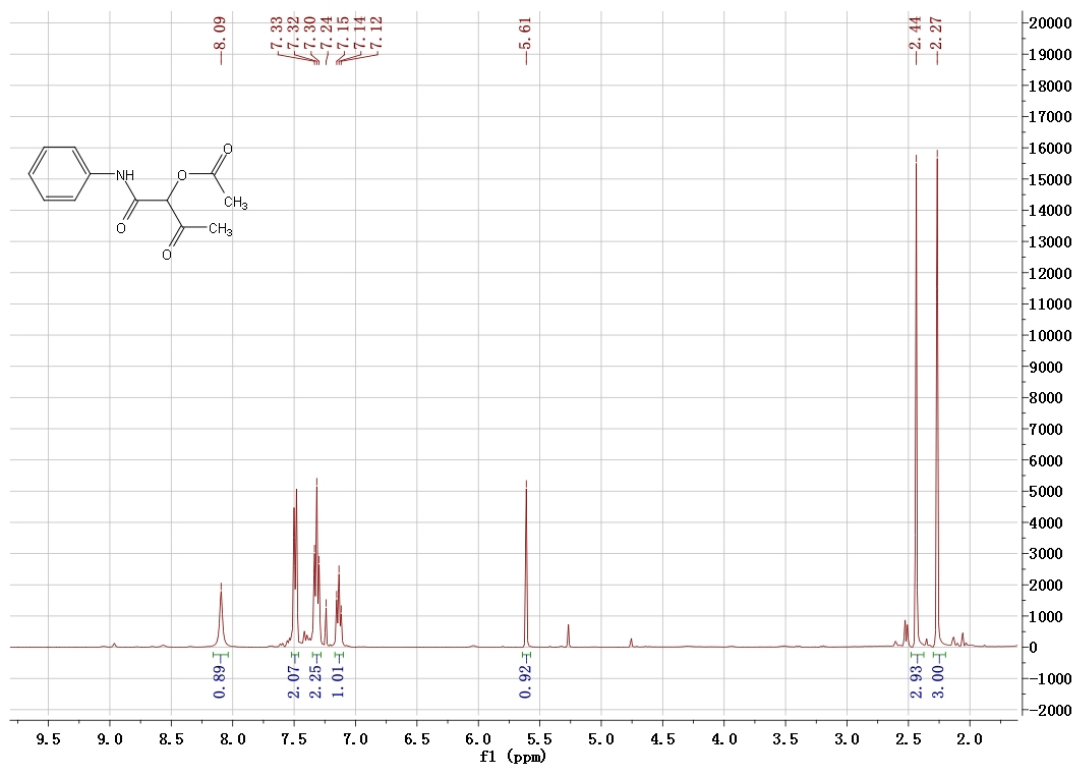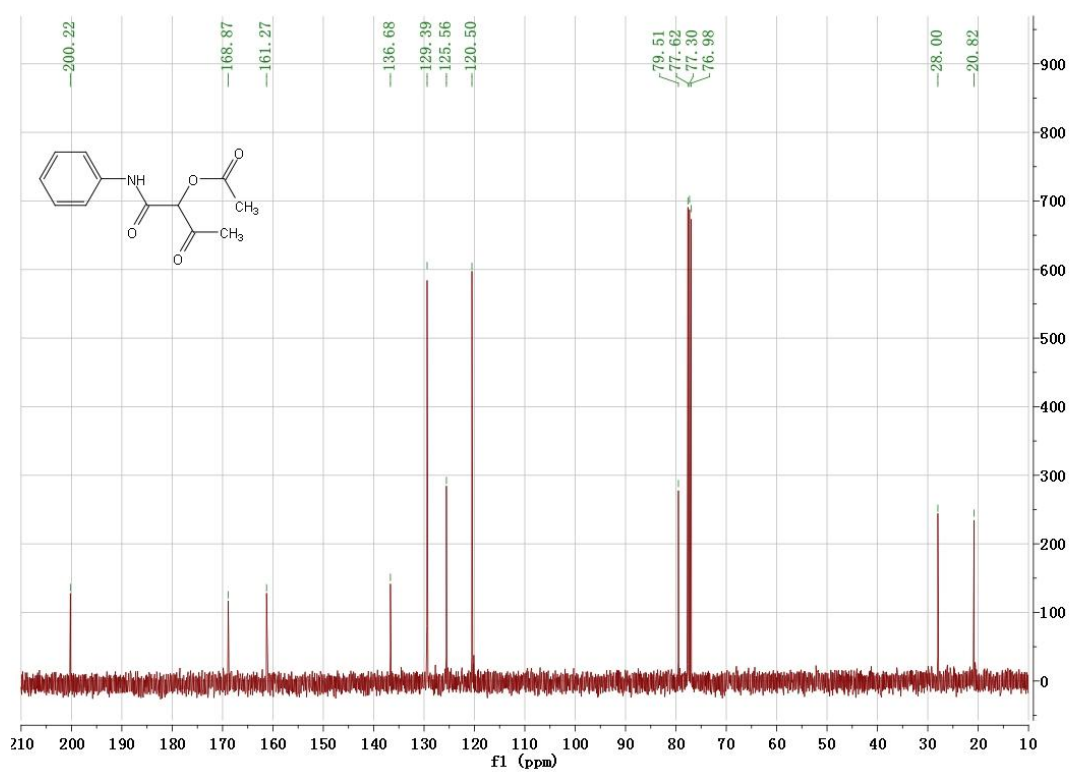

2b

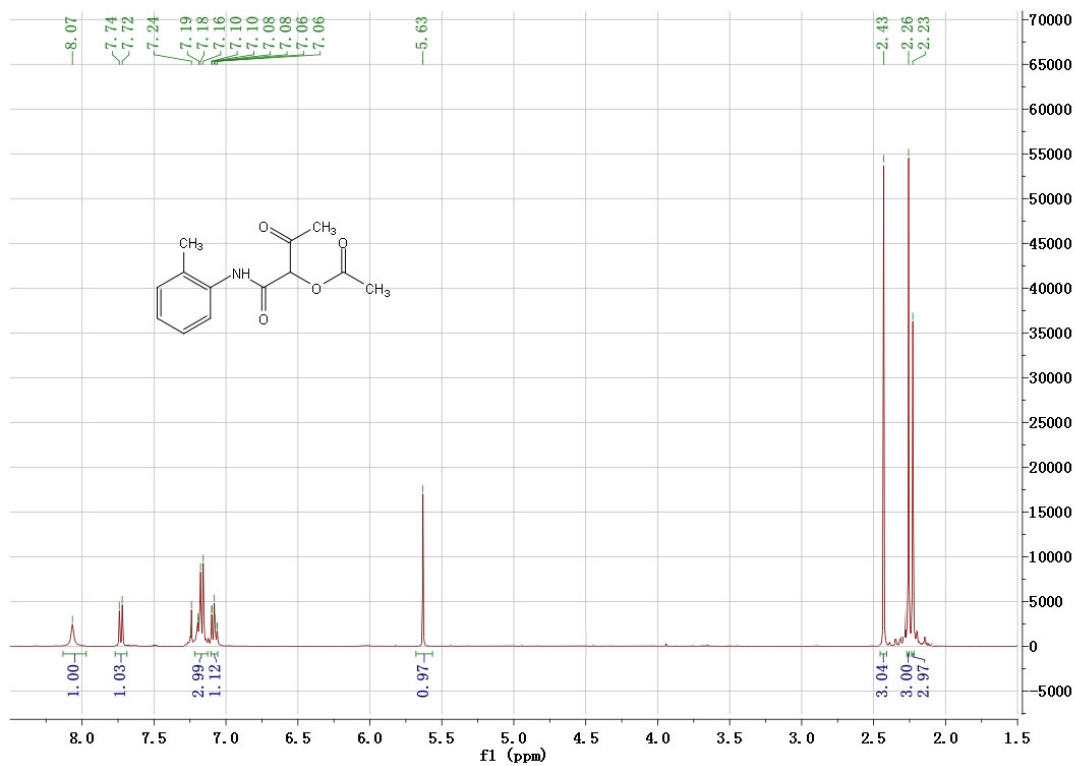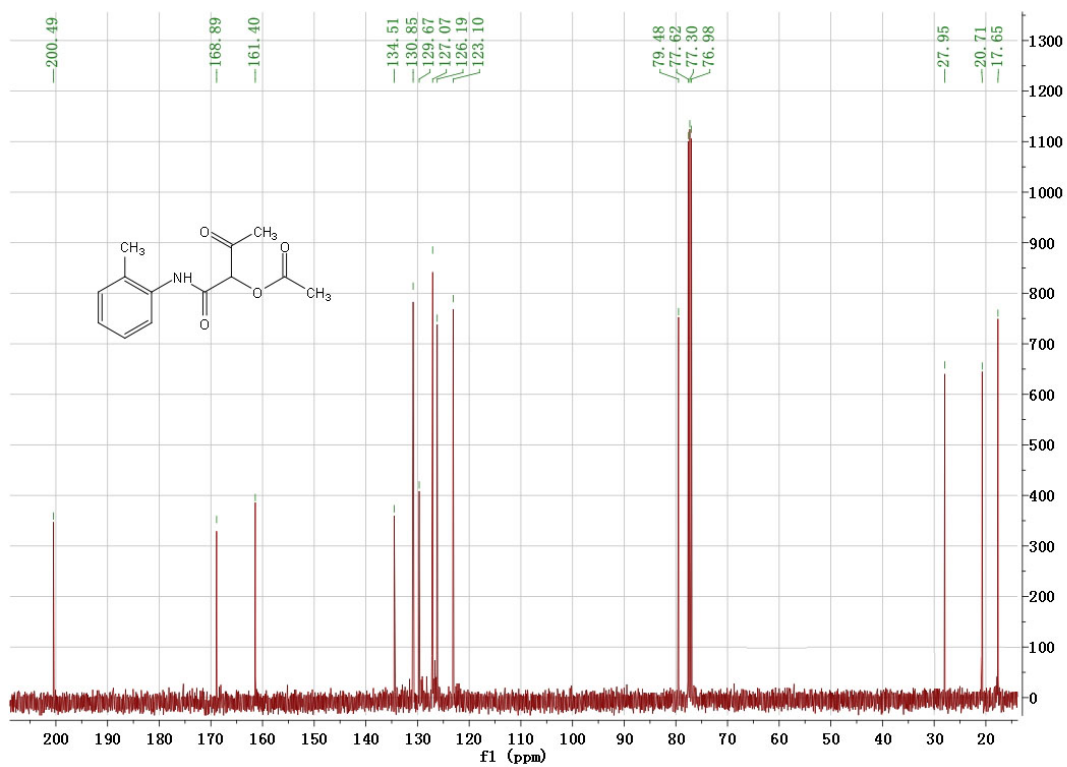

2c

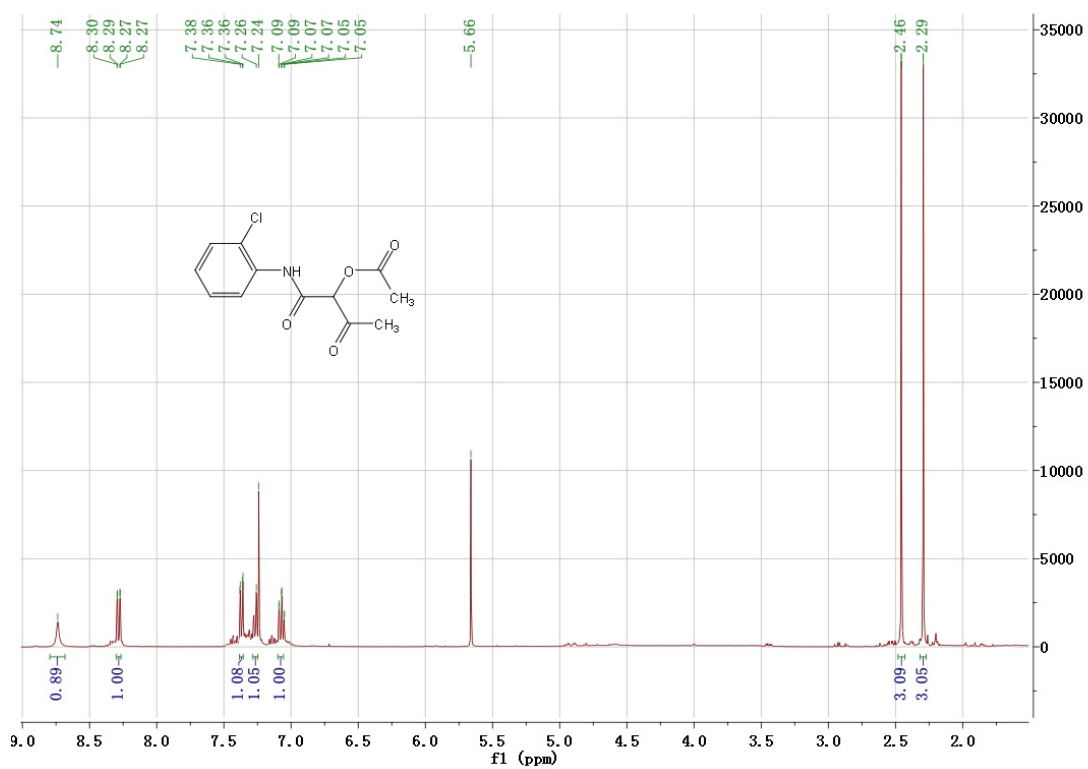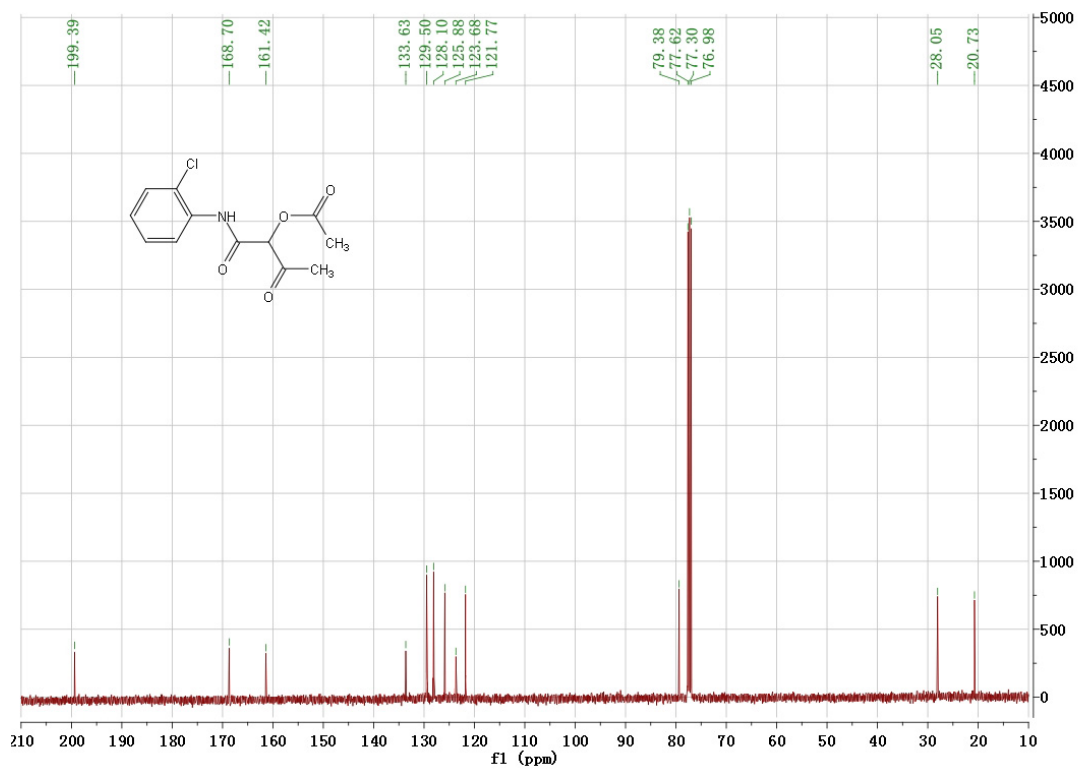



2d

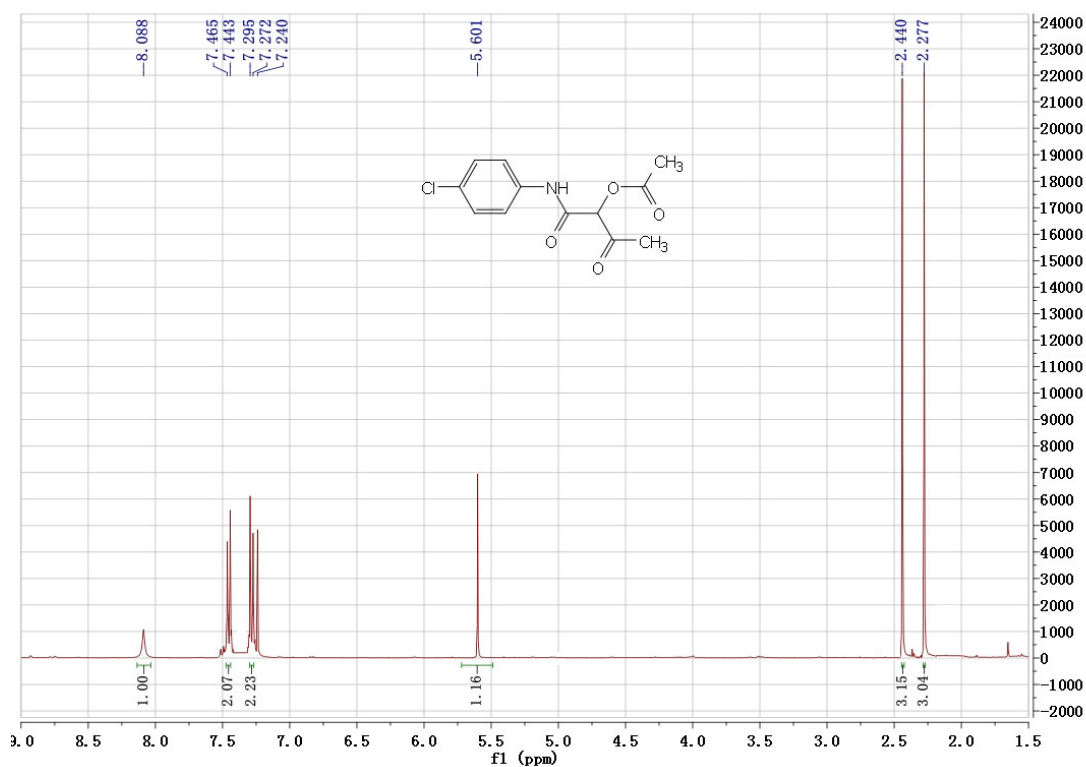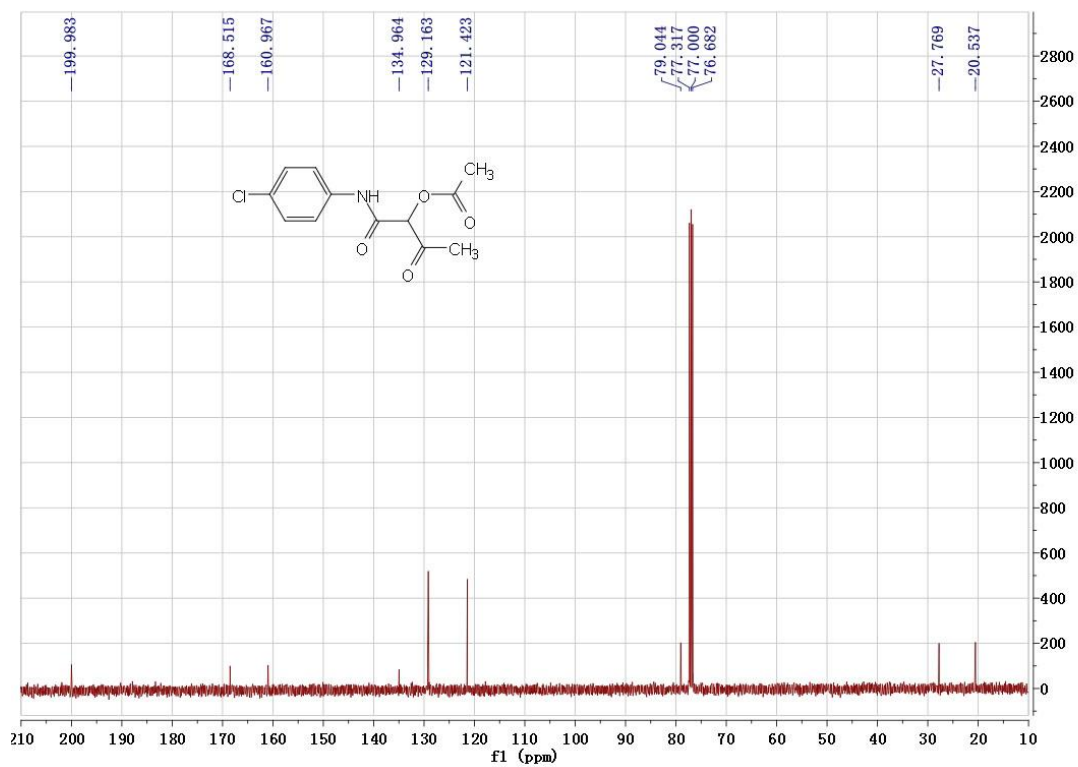

2e

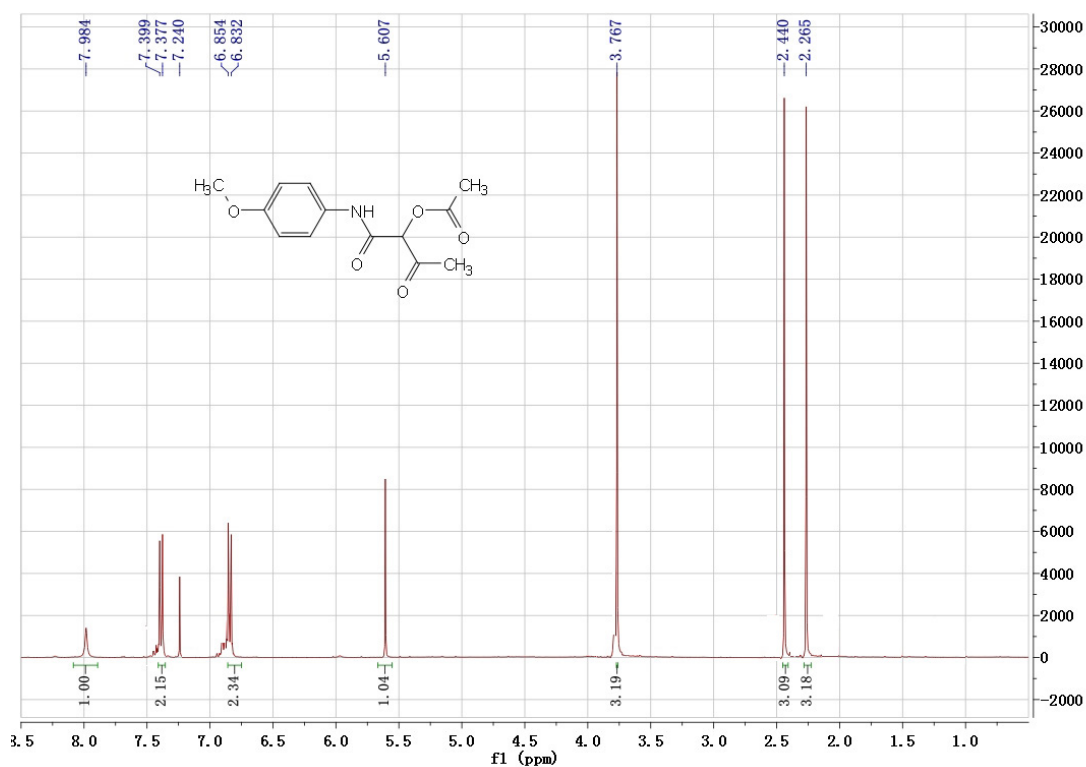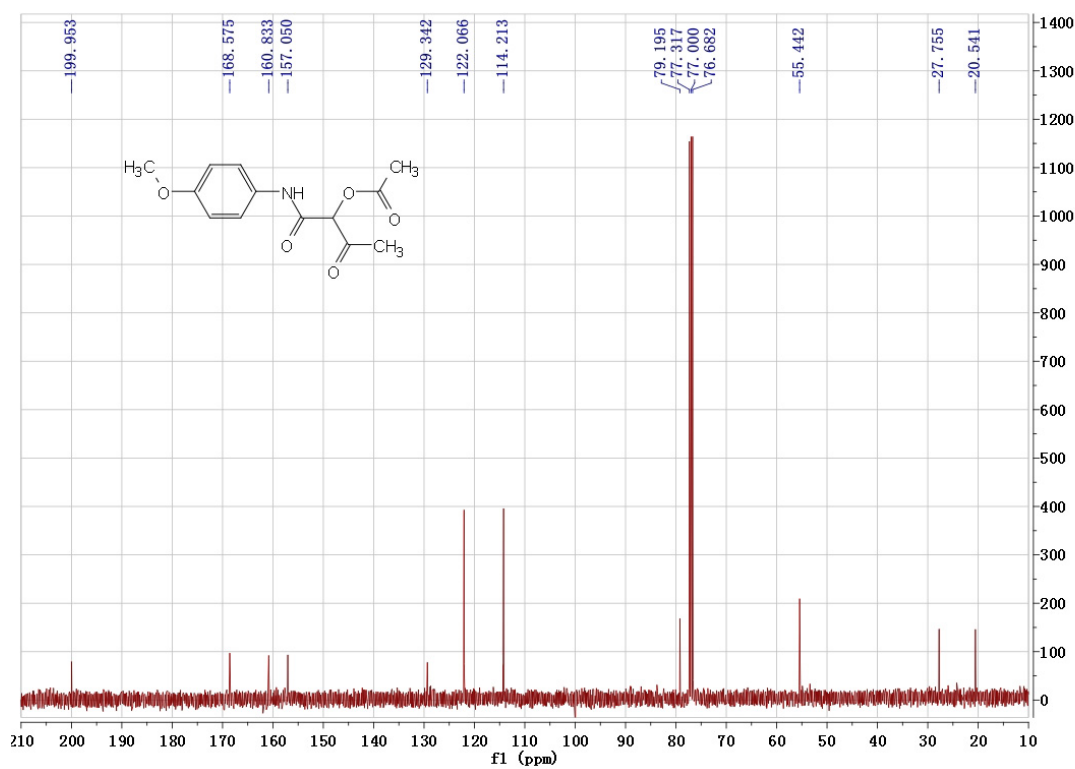

2f

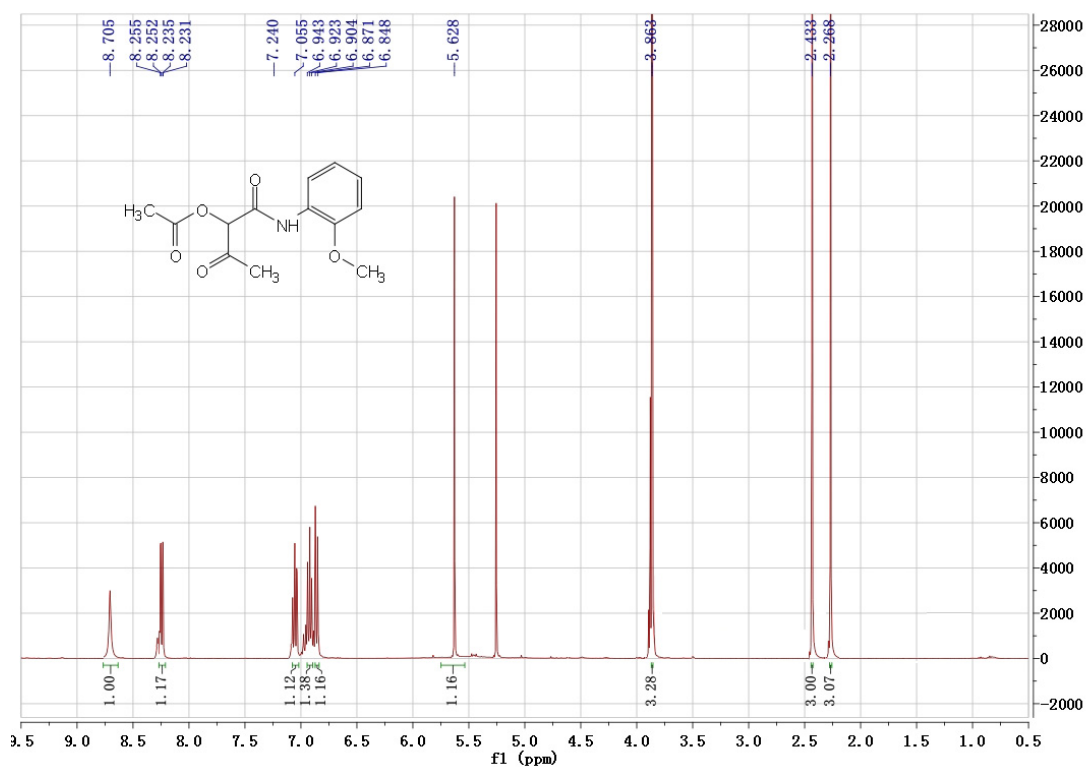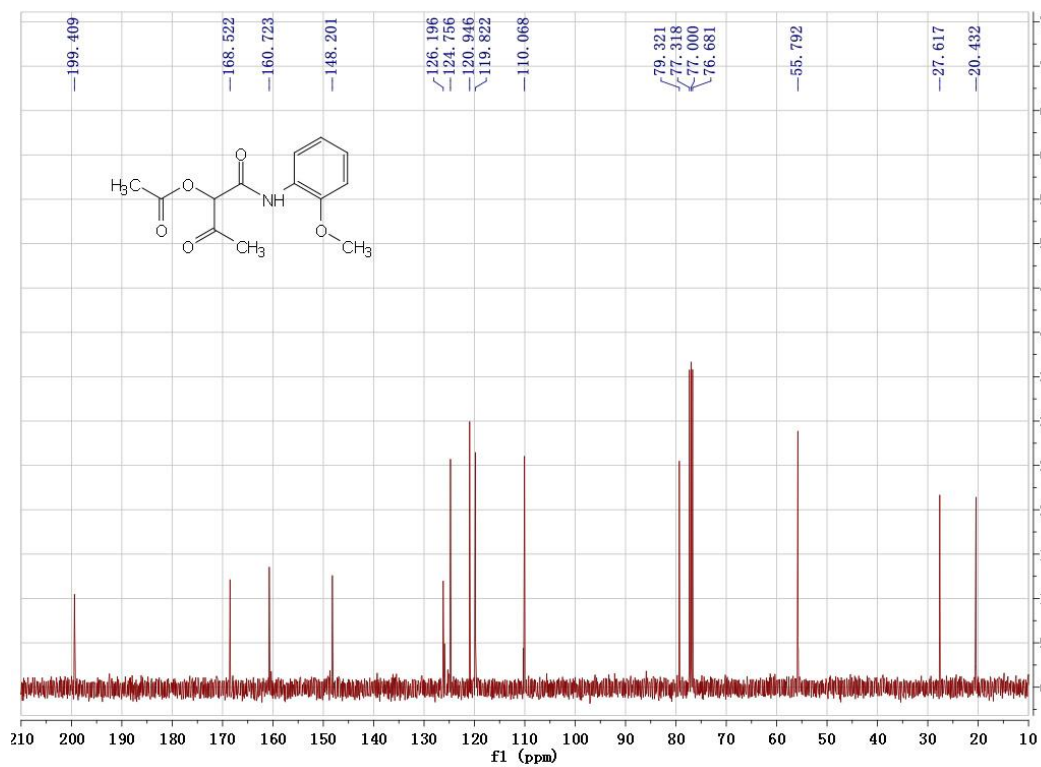

2g

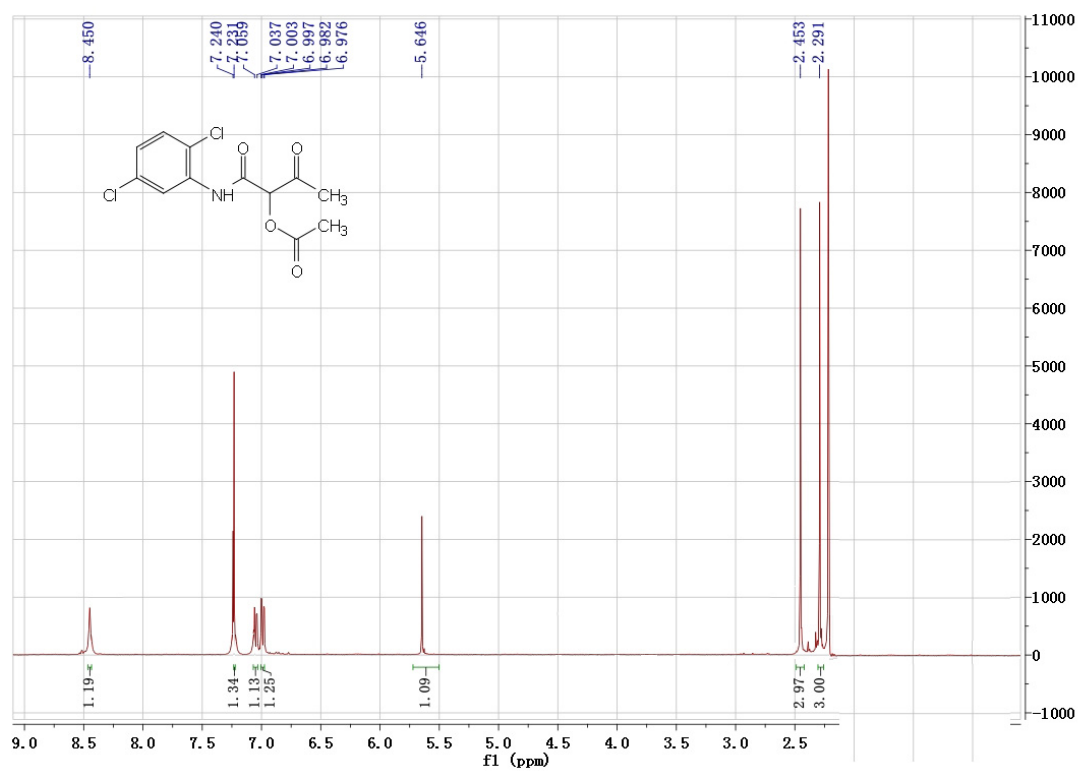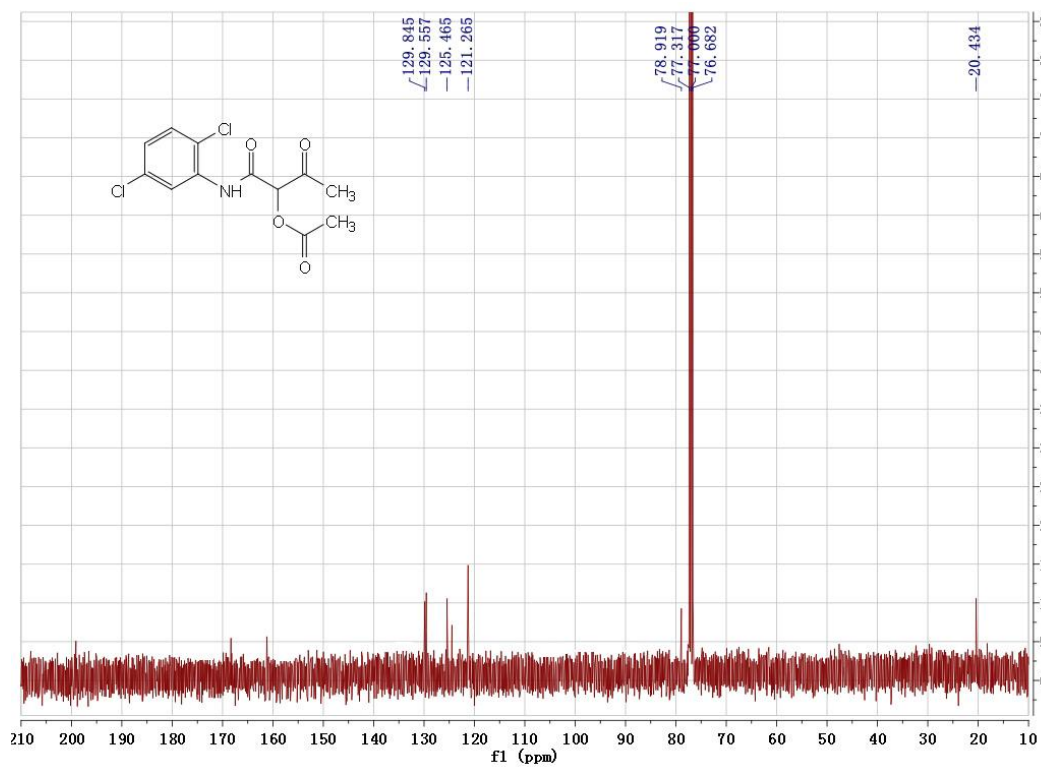

2h

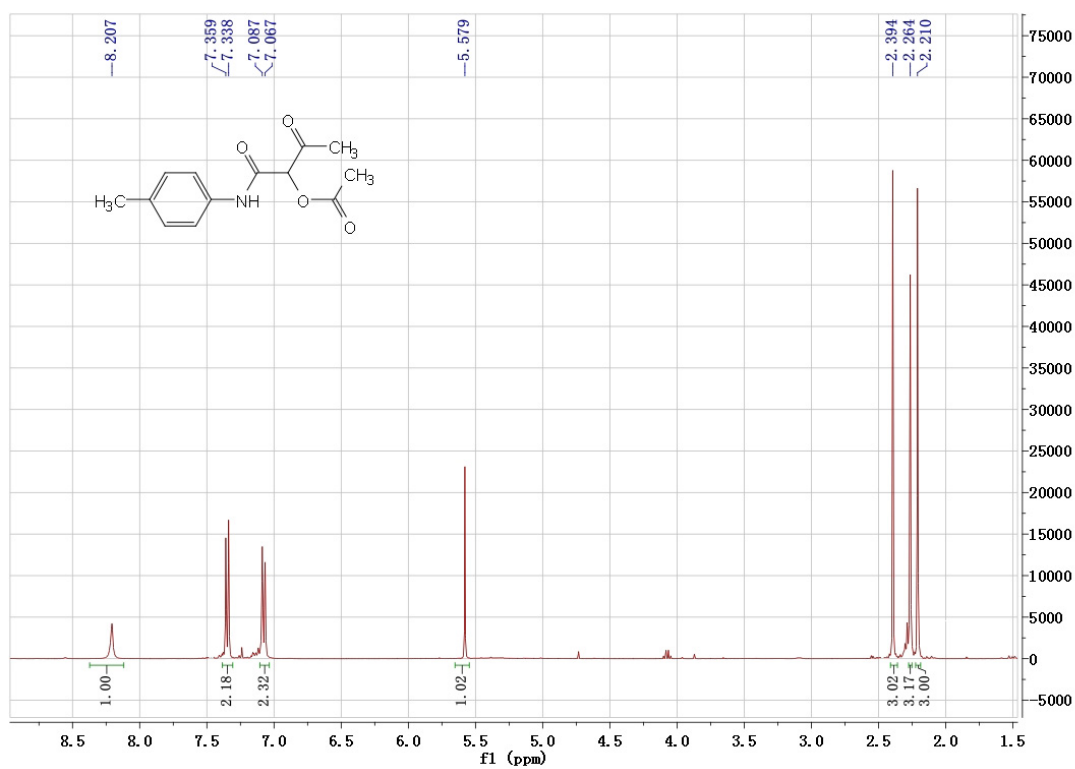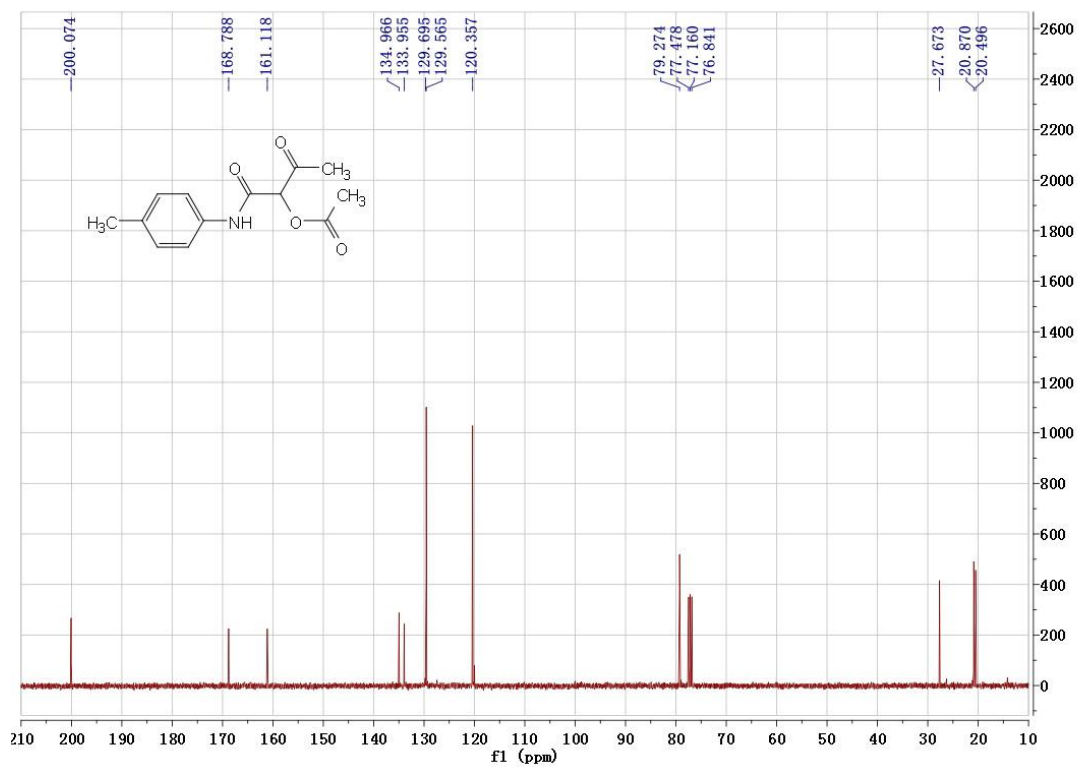

2i

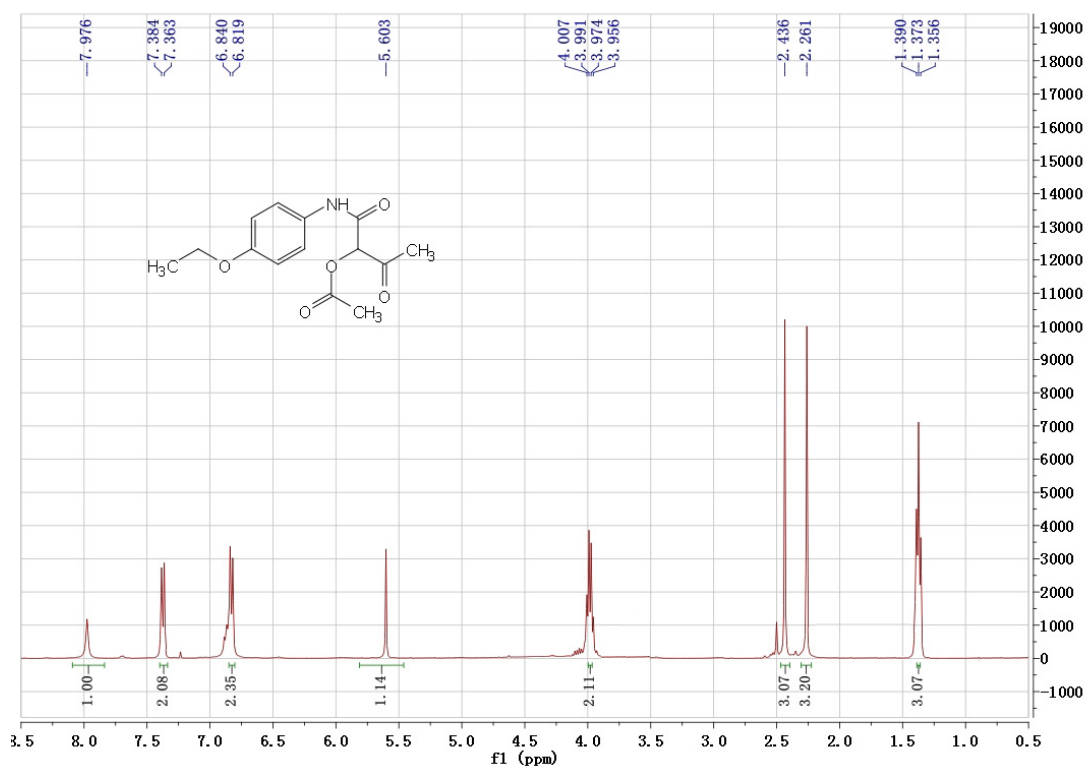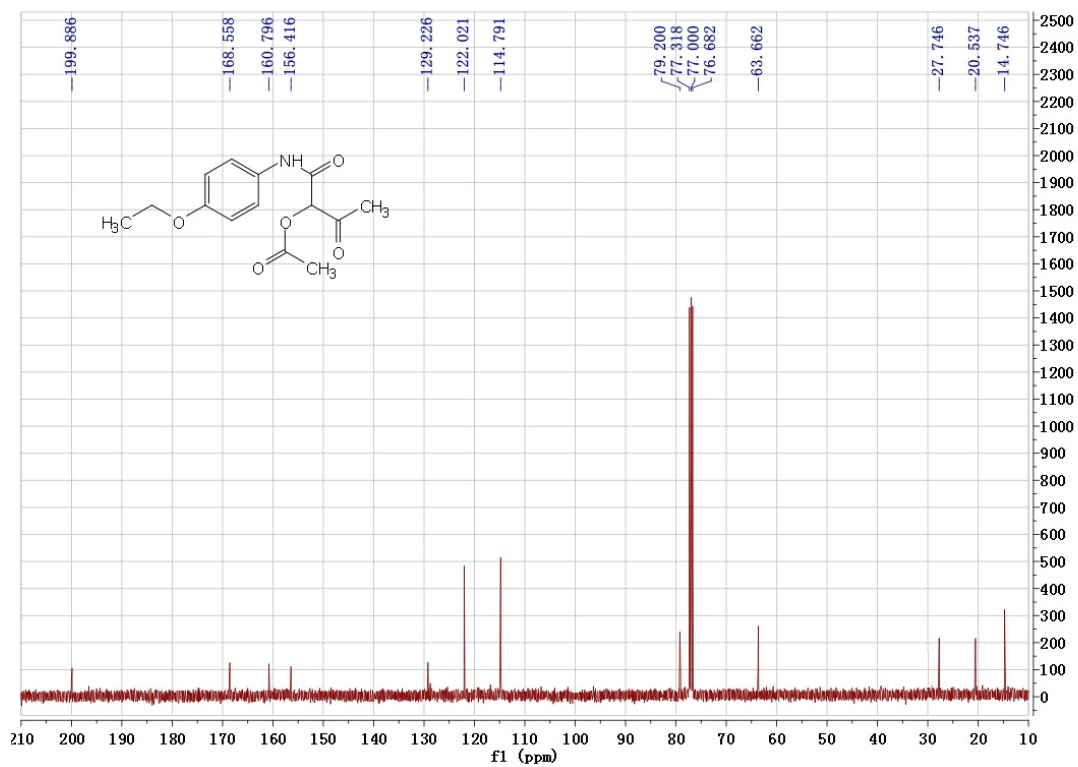

2j

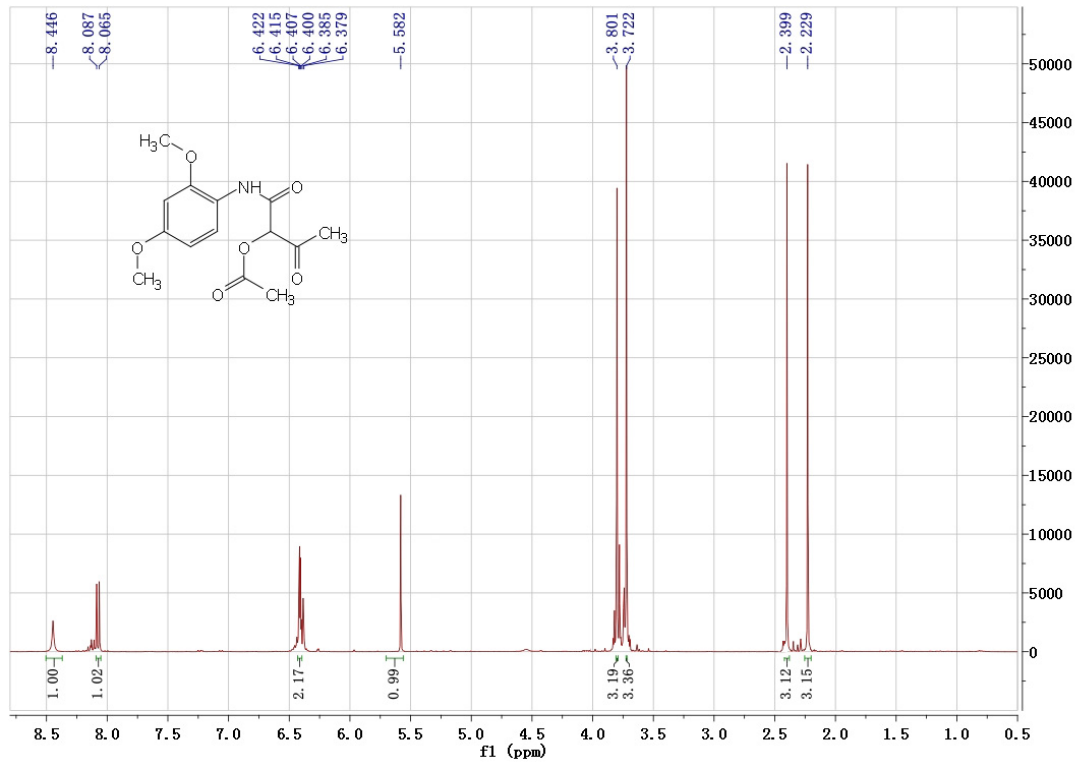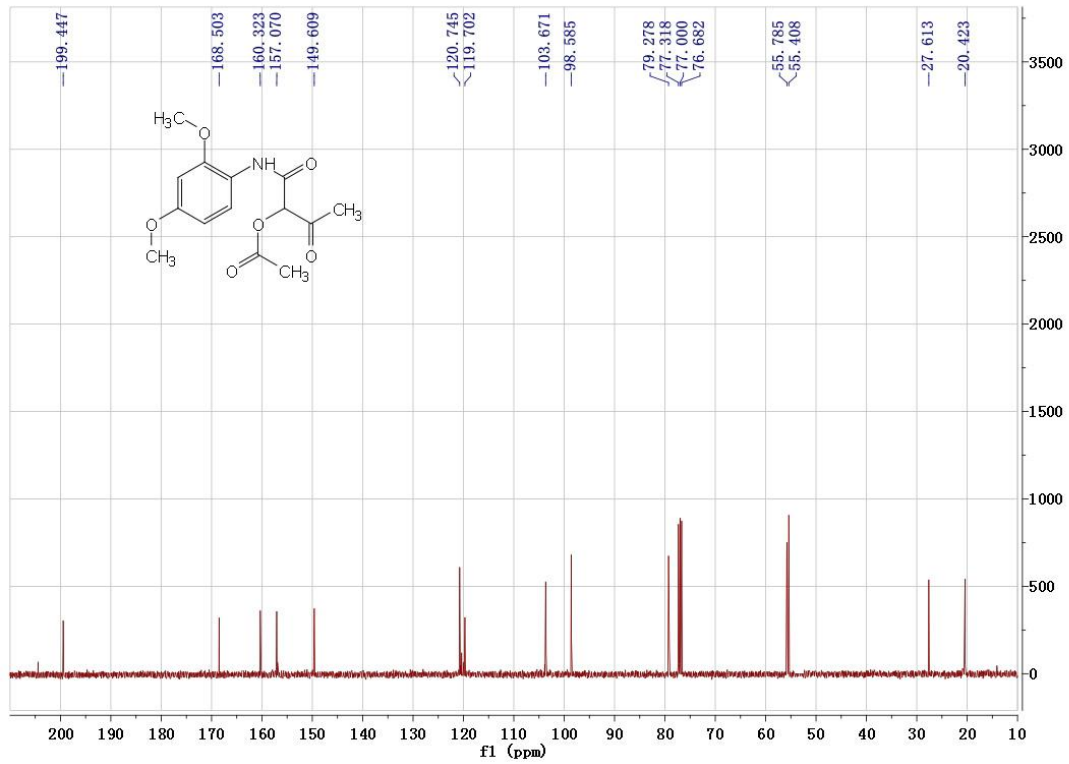

2k

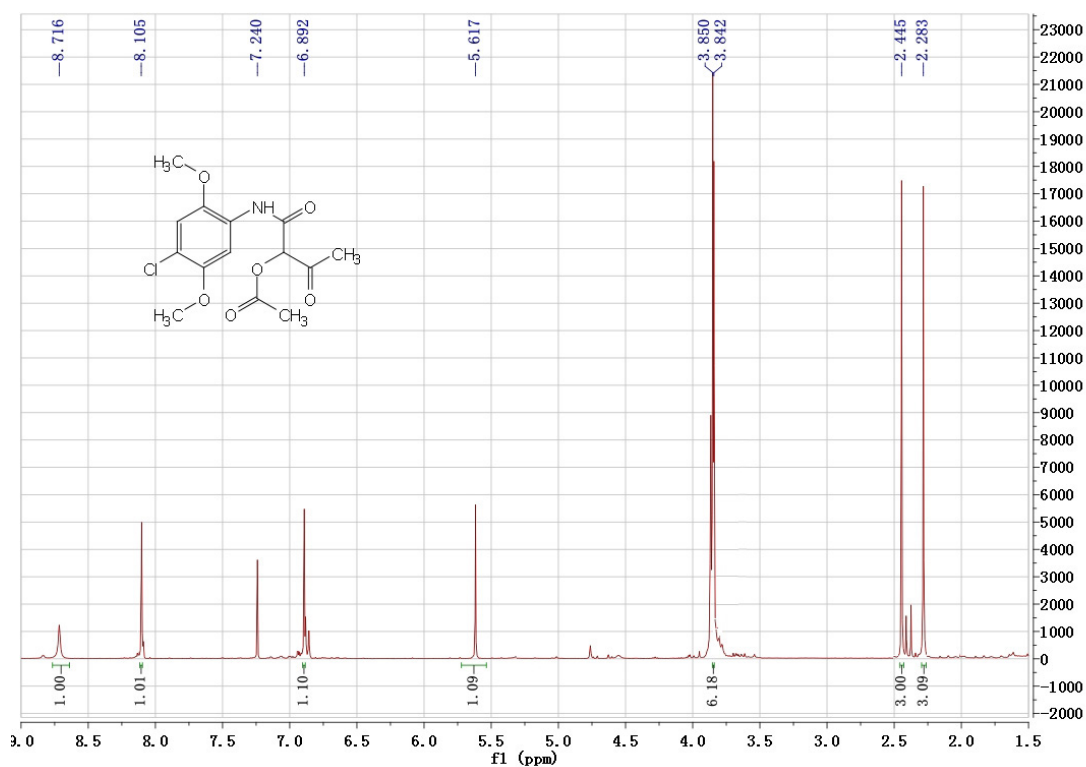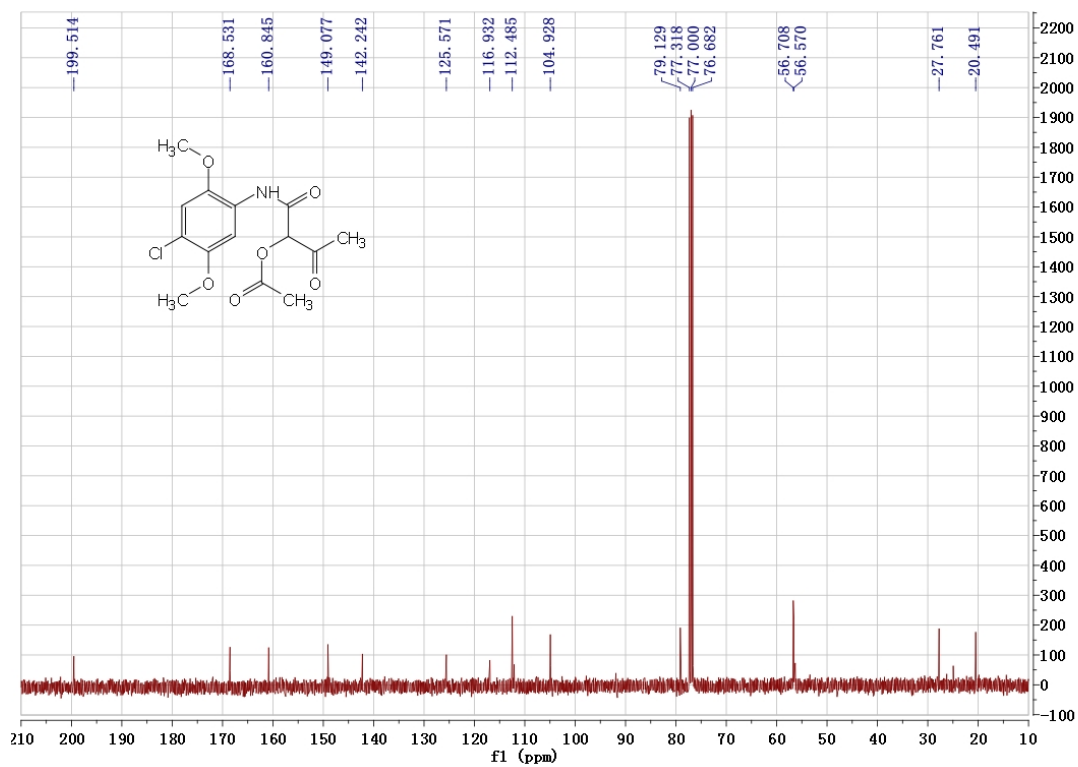



21

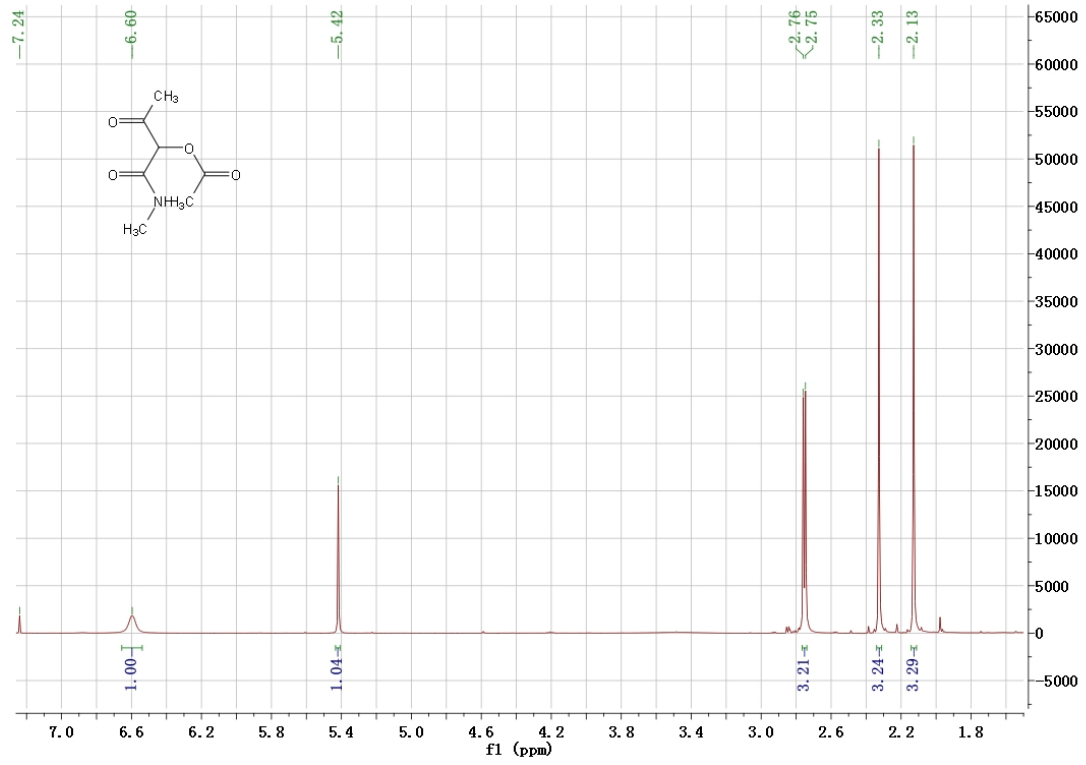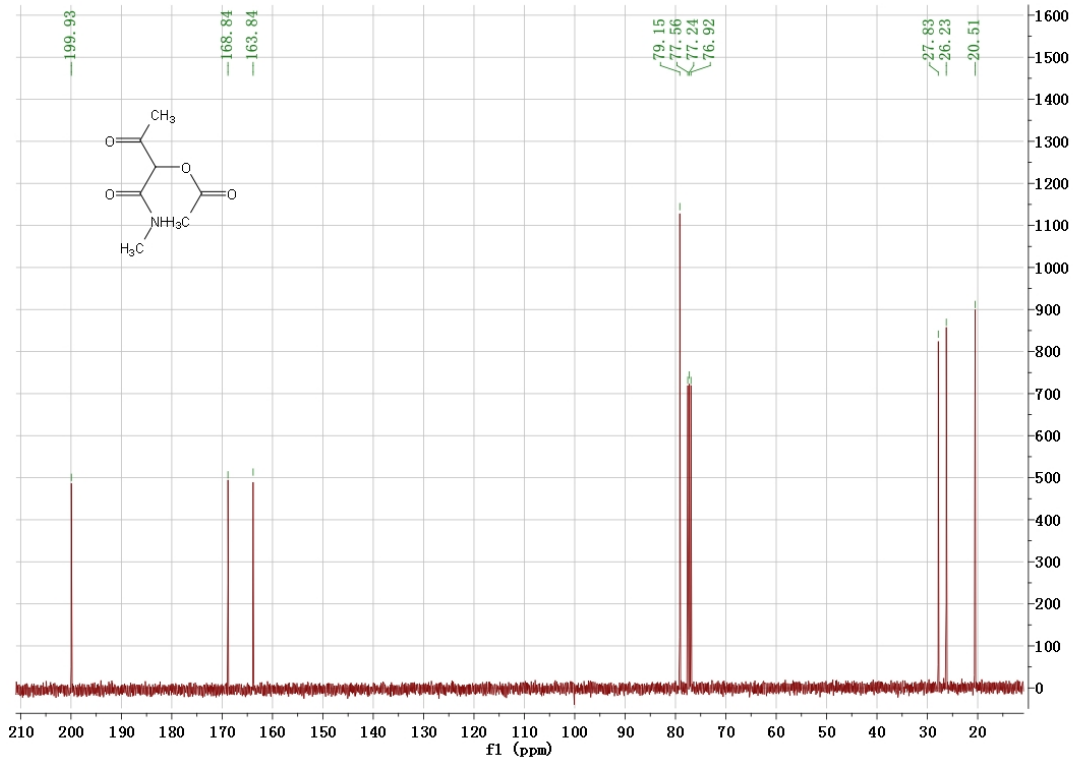

2m

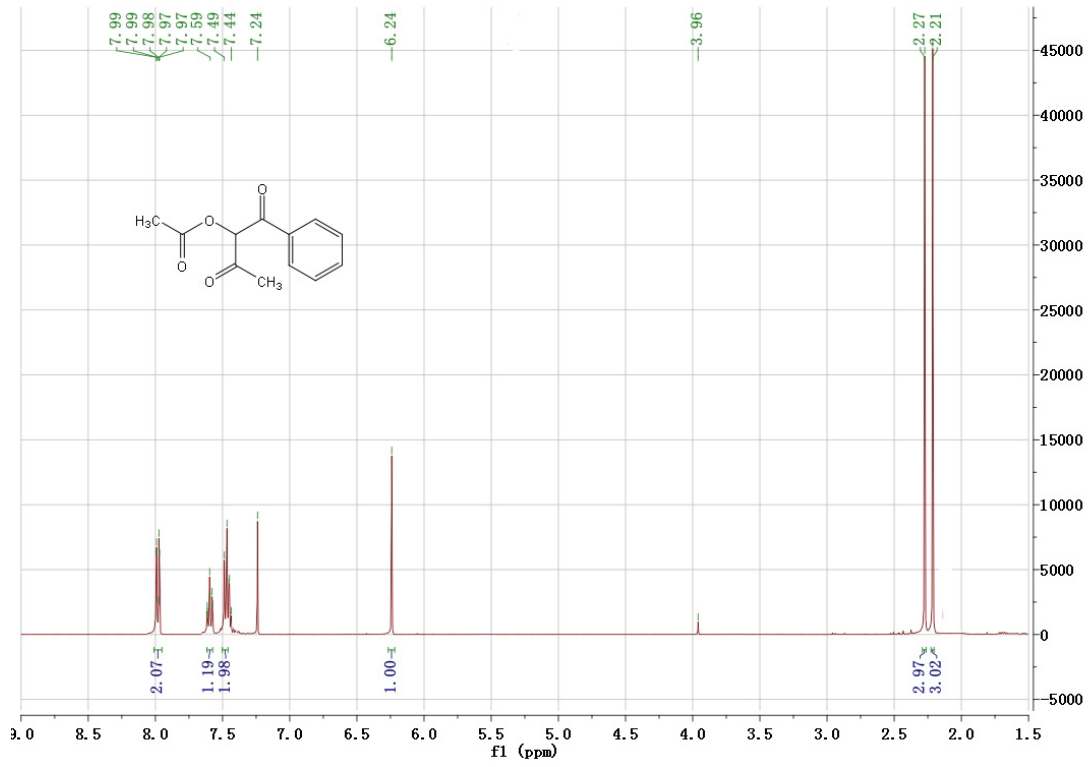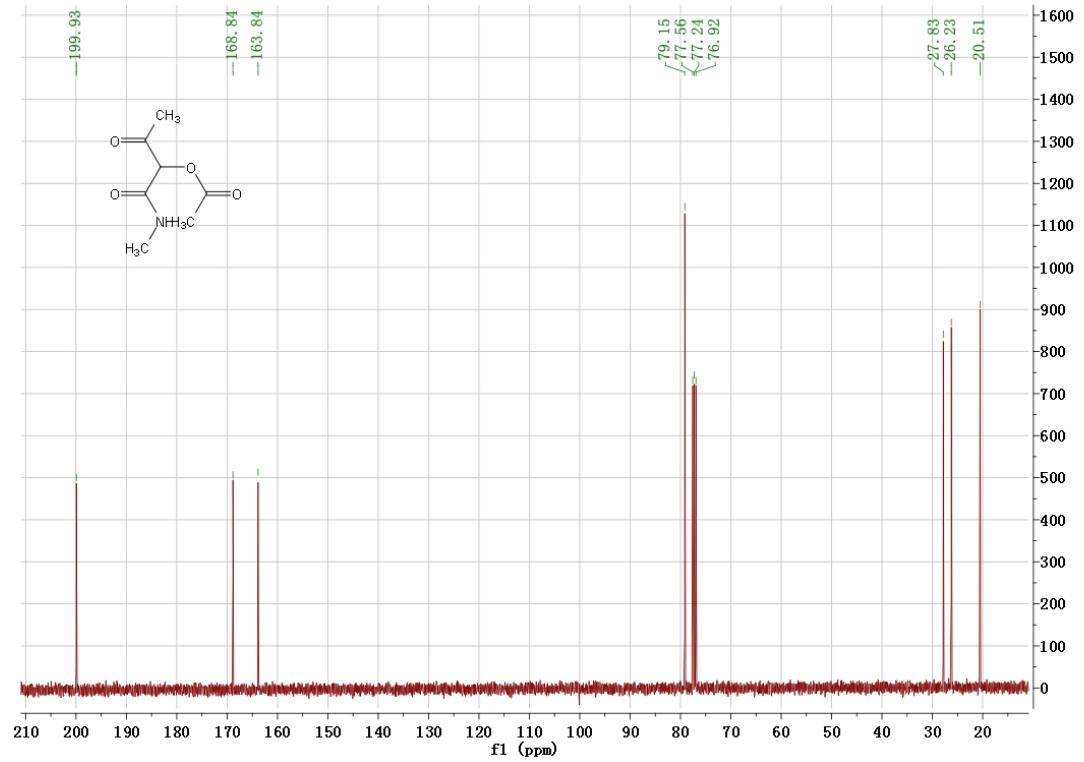

2n

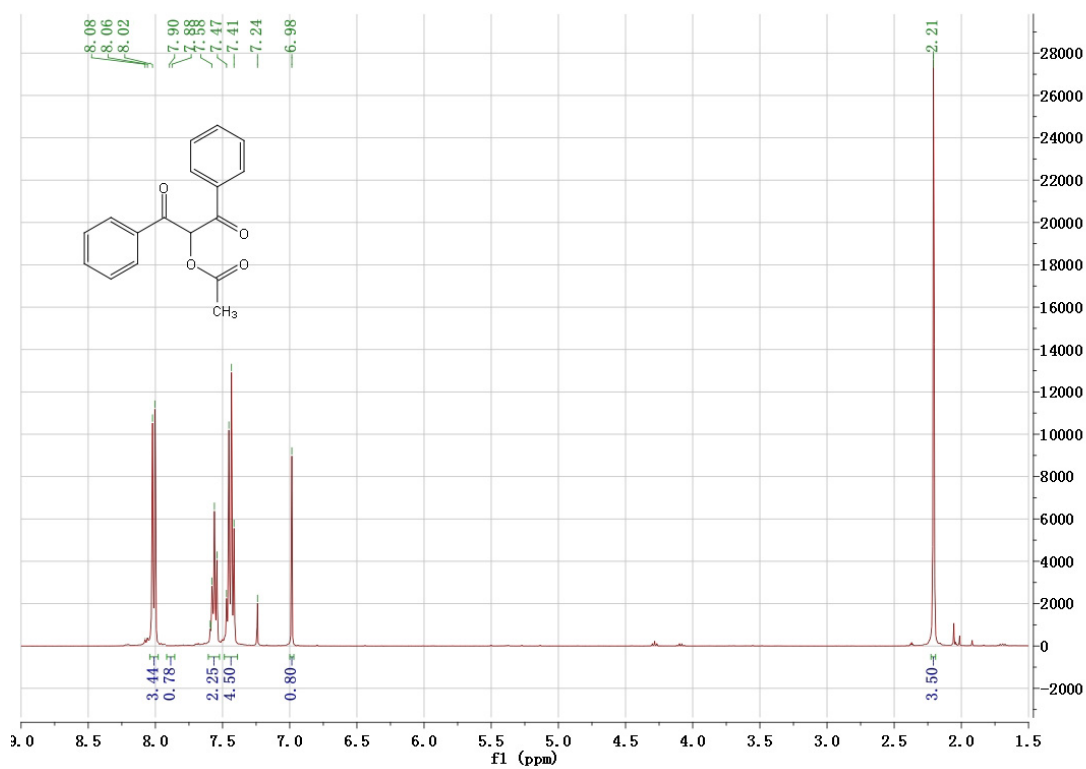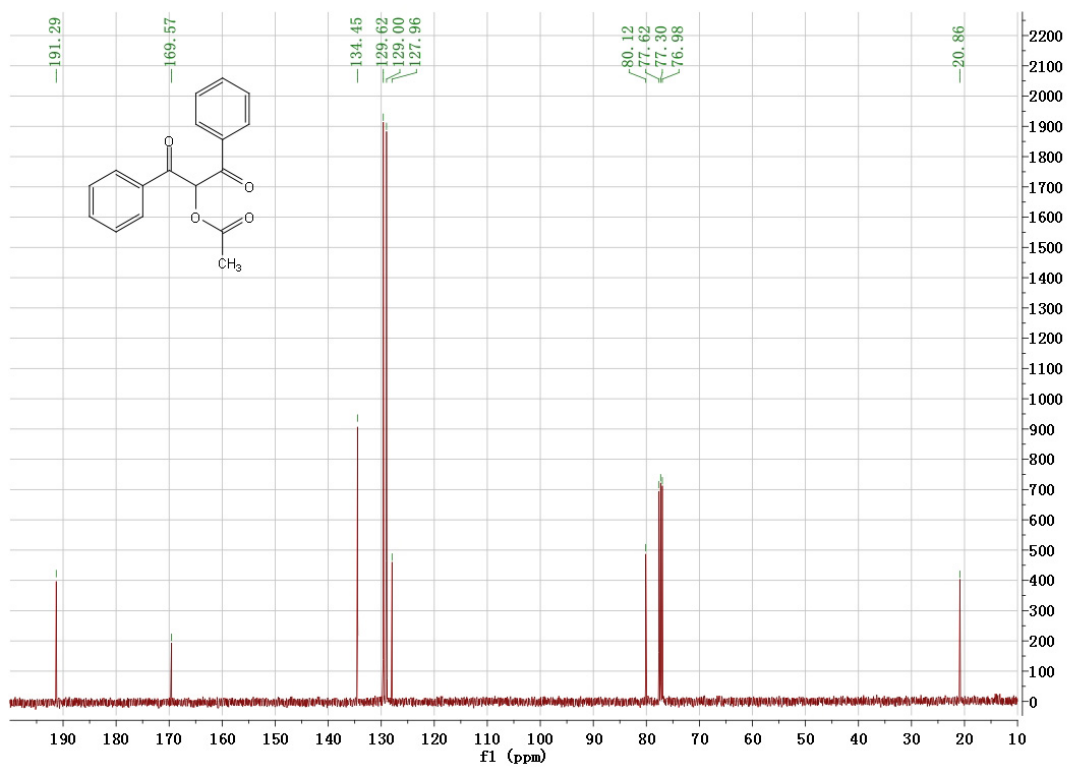

20

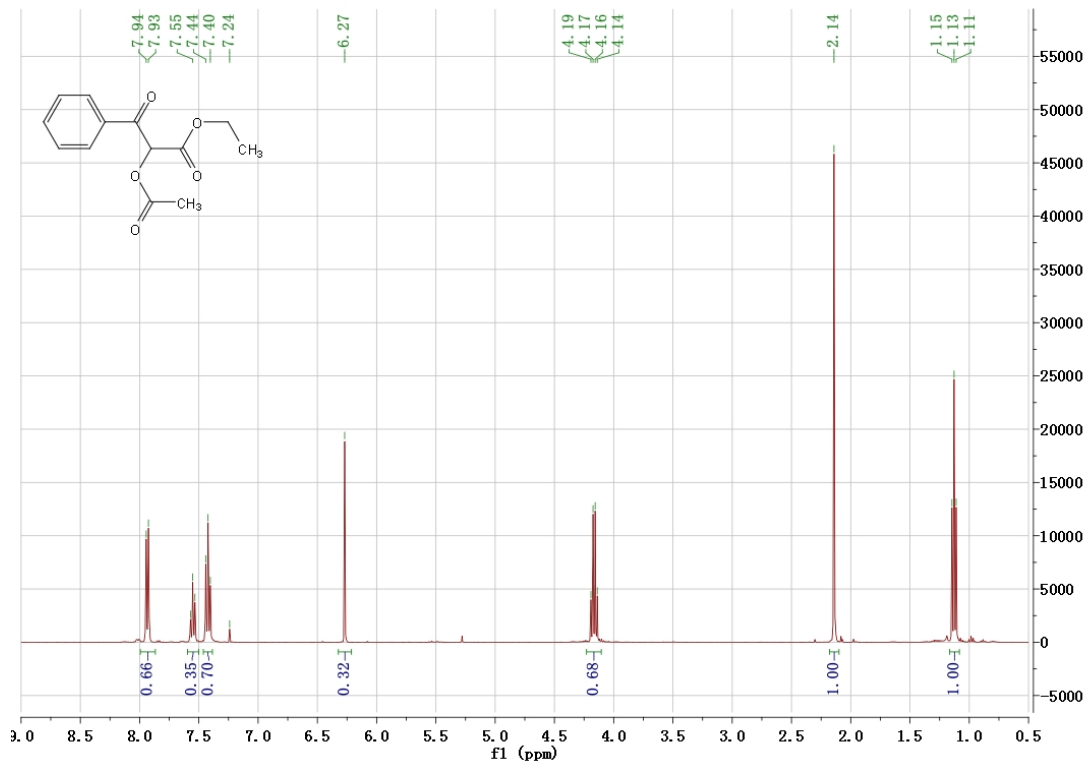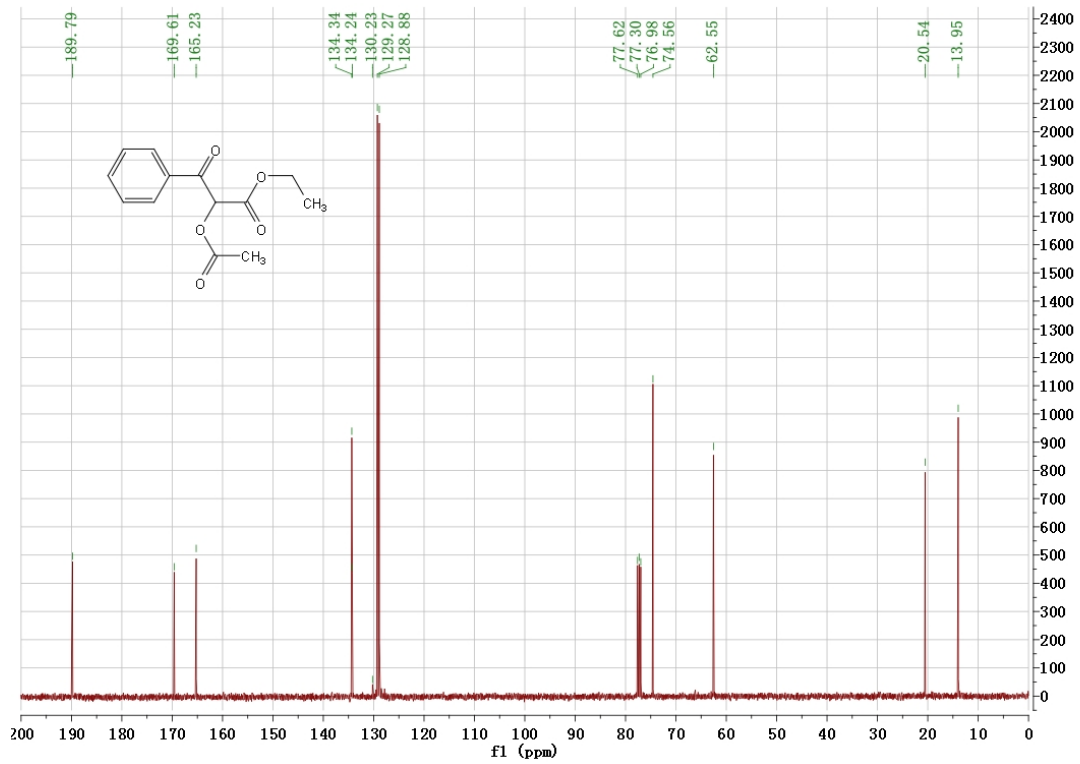

## References

- [1] Han, M.; Nam, K. D.; Hahn, H. G.; Shin, D. Y. *Tetrahedron Lett.* 2008, 49, 5217–5219.
- [2] Ahmed, Z.; Fischer, C.; Spannenberg, A.; Langer, P. *Tetrahedron* 2006, 62, 4800–4806.
- [3] Yu, J.; Tian, J.; Zhanga, C. *Adv. Synth. Catal.* 2010, 352, 531–546.
- [4] Altuna-Urquijo, M.; Gehre, A.; Stanforth, S. P.; Tarbit, P. *Tetrahedron* 2009, 65, 975–984.
